# Supplementary material
Source: publisher figshare collection journal article supplement (https://acs.figshare.com/ndownloader/files/3779818)
Supplement: Supplementary file 1 [file 3779818]

**Supporting Information For:**

**Soapwort Saporin L3 Expression in Yeast, Mutagenesis and RNA  
Substrate Specificity<sup>†</sup>**

*Hongling Yuan, Quan Du, Matthew B. Sturm and Vern L. Schramm<sup>\*</sup>*

Department of Biochemistry, Albert Einstein College of Medicine, 1300 Morris Park  
Avenue, Bronx, New York 10461

<sup>†</sup>Supported by Grants CA072444 and GM41916 from NIH, and from funds provided by  
the Albert Einstein College of Medicine

\*Address correspondence to: Vern L. Schramm

Department of Biochemistry, Albert Einstein College of Medicine, 1300 Morris Park  
Avenue, Bronx, New York 10461; Phone: (718) 430-2813, Fax: (718) 430-8565, Email:  
vern.schramm@einstein.yu.edu

## Supporting information

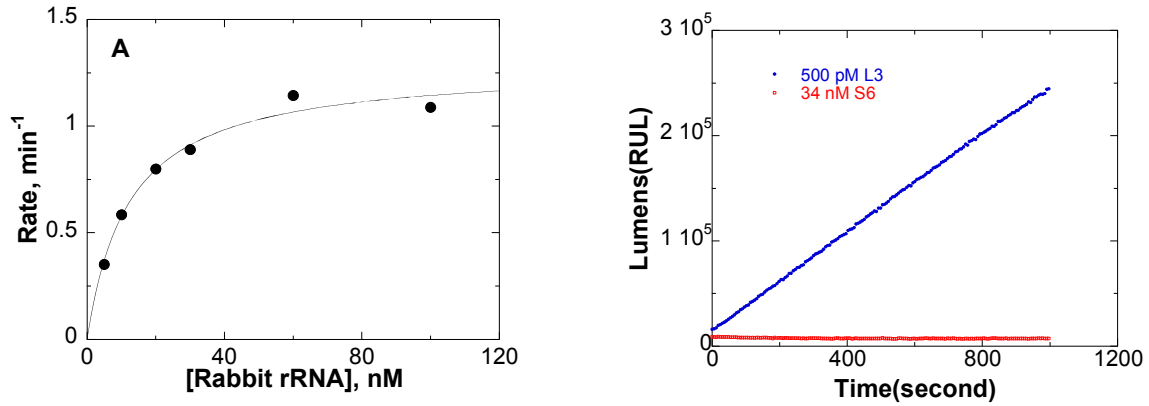

Fig. S1: Continuous assay kinetics of saporin S6 in 100 mM Tris pH 7.7. Panel A shows the kinetic curve fits for Saporin S6 catalysis of rabbit rRNA. Panel B shows initial rate slopes (lumens/second) with saporin L3 Ala14Cys and Saporin S6 with increasing concentrations of yeast tRNA as a substrate.
